# Supplementary material
Source: HighWire-hosted journal article supplement (https://bmjopen.bmj.com/content/11/2/e035252)
Supplement: inline-supplementary-material-1 [file inline-supplementary-material-1.pdf]

## Supplementary File

### Study measures - description

#### *Suicidal ideation (SI)*

Suicidal ideation was assessed utilising item 9 of the Patient and Health Questionnaire (PHQ-9).<sup>27</sup>

Participants indicated how often over the last two weeks they had been bothered by “thoughts that you would be better off dead, or of hurting yourself in some way”. Response options ranged from 1 = *not at all* to 4 = *every day*.

#### *Socio-economic demographics*

Participants completed demographic measures, which included age, sex, ethnicity, sexuality, and relationship status. Measures of socioeconomic conditions included education level, employment status, change in financial circumstances over the past year, and housing quality.

#### *Health*

Physical health was assessed with the four physical health dimensions of the *EuroQol five-dimension scale* (EQ-5D).<sup>31</sup> Health conditions were assessed with a single item from the *Adult Psychiatric Morbidity Survey: Survey of Mental Health and Wellbeing, England*<sup>33</sup> that allowed participants to indicate if they suffered from any of 22 named conditions, with the option to list an unnamed condition. Using this item, physical and mental health comorbidity was calculated and categorised into no conditions, mental health condition/s only, physical health condition/s only, and physical and mental health condition/s. Participants also indicated the extent to which medication side effects bothered them. Mental health was assessed using a series of validated instruments. Specifically, depression was measured using the nine-item PHQ-9<sup>27</sup> with item 9 (suicidal ideation) excluded as it was used as the dependent variable; anxiety was measured with the seven-item *Generalised Anxiety Disorder* scale (GAD-7),<sup>36</sup> paranoia was measured using the

persecution subscale of the *Persecution and Deservedness Scale* for symptoms of paranoia (PaDS-5),<sup>37</sup> and wellbeing was assessed with the *Warwick-Edinburgh Mental Wellbeing Scale* (WEMWBS).<sup>38</sup> Measures of psychological variables known to be associated with poor mental health were also obtained, including the *Single-Item Self Esteem Scale* (SISES),<sup>39</sup> along with abbreviated scales for empathy (Interpersonal Reactivity Index),<sup>40</sup> hopelessness (*Brief-H-Pos*; reverse scored)<sup>41</sup> and locus of control (Multidimensional Locus of Control Scales).<sup>42</sup>

### ***Lifestyle factors***

Alcohol consumption was measured using the number of units of alcohol participants reported consuming in the previous seven days. Participants were categorised in accordance with recommended drinking guidelines<sup>66</sup> as: abstaining, at or below recommended, above recommended, or more than double recommended levels. Past and present smoking behaviour was assessed with a single item adapted from the NHS Merseyside Lifestyle Survey.<sup>35</sup>

### ***Social connectedness/capital***

Participants indicated the number of hours they spent caring for a friend or family member. Social support, socialising, and neighbourhood belonging were assessed with single items from the *Community Life Survey*.<sup>32</sup>

**Supplementary File Table 1. Coding and source of study measures**

| Variable | Source                               | Description/Example | Original scoring                                                                                                                                                                                         | Recoding for analysis                                                              |
|----------|--------------------------------------|---------------------|----------------------------------------------------------------------------------------------------------------------------------------------------------------------------------------------------------|------------------------------------------------------------------------------------|
| Age      | Office for<br>National<br>Statistics | N/A                 | 1 = Under 16 years<br><br>2 = 16-17 years<br><br>3 = 18-24 years<br><br>4 = 25-34 years<br><br>5 = 35-44 years<br><br>6 = 45-54 years<br><br>7 = 55-64 years<br><br>8 = 65-74 years<br><br>9 = 75+ years | 1 = 18-24 years<br><br>2 = 25-44 years<br><br>3 = 45-64 years<br><br>4 = 65+ years |

|           |                                      |     |                                                                                                                                                                                                                  |                                   |
|-----------|--------------------------------------|-----|------------------------------------------------------------------------------------------------------------------------------------------------------------------------------------------------------------------|-----------------------------------|
| Sex       | Office for<br>National<br>Statistics | N/A | 1 = Male<br><br>2 = Female<br><br>3 = Other                                                                                                                                                                      | 1 = Male<br><br>2 = Female        |
| Sexuality | Office for<br>National<br>Statistics | N/A | 1 = Heterosexual or straight<br><br>2 = Gay or Lesbian<br><br>3 = Bisexual<br><br>4 = Other                                                                                                                      | 0 = heterosexual<br><br>1 = LGBTQ |
| Ethnicity | Office for<br>National<br>Statistics | N/A | 1 = English / Welsh / Scottish / Northern Irish / British<br><br>2 = Irish<br><br>3 = Gypsy or Irish Traveller<br><br>4 = Any other White background, <i>please specify</i><br><br>5 = White and Black Caribbean | 0 = White<br><br>1 = BME          |

|  |  |  |                                                                                                                                                                                                                                                                                                                                                                                                                                      |  |
|--|--|--|--------------------------------------------------------------------------------------------------------------------------------------------------------------------------------------------------------------------------------------------------------------------------------------------------------------------------------------------------------------------------------------------------------------------------------------|--|
|  |  |  | <p>6 = White and Black African</p> <p>7 = White and Asian</p> <p>8 = Any other Mixed / Multiple ethnic background,<br/><i>please specify</i></p> <p>9 = Indian</p> <p>10 = Pakistani</p> <p>11 = Bangladeshi</p> <p>12 = Chinese</p> <p>13 = Any other Asian background, <i>please specify</i></p> <p>14 = African</p> <p>15 = Caribbean</p> <p>16 = Any other Black / African / Caribbean<br/>background, <i>please specify</i></p> |  |
|--|--|--|--------------------------------------------------------------------------------------------------------------------------------------------------------------------------------------------------------------------------------------------------------------------------------------------------------------------------------------------------------------------------------------------------------------------------------------|--|

|                     |                                |     |                                                                                                                                                                                                                                                                                                                                                       |                                 |
|---------------------|--------------------------------|-----|-------------------------------------------------------------------------------------------------------------------------------------------------------------------------------------------------------------------------------------------------------------------------------------------------------------------------------------------------------|---------------------------------|
|                     |                                |     | 17 = Arab                                                                                                                                                                                                                                                                                                                                             |                                 |
|                     |                                |     | 95 = Any other group, please specify                                                                                                                                                                                                                                                                                                                  |                                 |
| Relationship status | Office for National Statistics | N/A | 1 = Single/never married or in a same-sex civil partnership<br><br>2 = Married<br><br>3 = Separated, but still legally married<br><br>4 = Divorced<br><br>5 = Widowed<br><br>6 = Same-sex civil partnership<br><br>7 = Separated, but still in a same-sex civil partnership<br><br>8 = Formerly in a same-sex civil partnership that is now dissolved | 0 = Partnered<br><br>1 = Single |

|                |                                |     |                                                                                                                                                                                                                                                                                                                                                                                                             |                                      |
|----------------|--------------------------------|-----|-------------------------------------------------------------------------------------------------------------------------------------------------------------------------------------------------------------------------------------------------------------------------------------------------------------------------------------------------------------------------------------------------------------|--------------------------------------|
|                |                                |     | 9 = Surviving partner from a same-sex civil partnership<br><br>10 = prefer not to say                                                                                                                                                                                                                                                                                                                       |                                      |
| Non-employment | Office for National Statistics | N/A | 1 = Going to school or college full time (including on vacation)<br><br>2 = In paid employment or self employed (or temporarily away)<br><br>3 = On a Government scheme for employment training<br><br>4 = Doing unpaid work for a business that you own, or that a relative owns<br><br>5 = Waiting to take up paid work already obtained<br><br>6 = Looking for paid work or a Government training scheme | 0 = employed<br><br>1 = not employed |

Mulholland H, et al. *BMJ Open* 2021; 11:e035252. doi: 10.1136/bmjopen-2019-035252



|                         |           |                                                                                                                                                                                                                              |                                                                                                               |     |
|-------------------------|-----------|------------------------------------------------------------------------------------------------------------------------------------------------------------------------------------------------------------------------------|---------------------------------------------------------------------------------------------------------------|-----|
|                         |           | <p>qualifications for which you received a certificate?</p> <p>What is your highest qualification?</p>                                                                                                                       | <p>1 = At degree level or above, 2 = Another kind of qualification</p>                                        |     |
| Caring responsibilities | UK Census | <p>Do you look after, or give any help or support to family members, friends, neighbours or others because of either a long term physical or mental ill-health / disability or problems related to old age? Do not count</p> | <p>1 = No</p> <p>2 = Yes, 1-19 hours/week</p> <p>3 = Yes, 20-49 hours/week</p> <p>4 = Yes, 50+ hours/week</p> | N/A |

|                 |                        |                                                                                                                                                                                                                                                                                |                                                                                                         |                                                                                                                 |
|-----------------|------------------------|--------------------------------------------------------------------------------------------------------------------------------------------------------------------------------------------------------------------------------------------------------------------------------|---------------------------------------------------------------------------------------------------------|-----------------------------------------------------------------------------------------------------------------|
|                 |                        | anything you do as part of your paid employment.                                                                                                                                                                                                                               |                                                                                                         |                                                                                                                 |
| Housing quality | English Housing Survey | <p>During the winter months, does condensation form on the windows or walls of any room in your home apart from the bathrooms or toilets?</p> <p>During the winter months, are there patches of mould or fungus in any room in your home, apart from bathrooms or toilets?</p> | <p>1 = Yes, 2 = No, 3 = Spontaneous: don't know</p> <p>1 = Yes, 2 = No, 3 = Spontaneous: don't know</p> | <p>0 = No problems</p> <p>1 = One problem</p> <p>2 = Two problems</p> <p>3 = Problems with all three issues</p> |

|                        |                           |                                                                                                                    |                                                                                       |                                                       |
|------------------------|---------------------------|--------------------------------------------------------------------------------------------------------------------|---------------------------------------------------------------------------------------|-------------------------------------------------------|
|                        |                           | During the cold winter weather, can you normally keep comfortably warm in your living room?                        | 1 = Yes, 2 = No, 3 = Spontaneous: don't know                                          |                                                       |
| Financial Situation    | Wealth and Assets Survey  | Would you say your household is better off or worse off financially than you were a year ago?                      | 1 = Better off<br>2 = About the same<br>3 = Worse off<br>4 = Don't know               | 1 = Better off<br>2 = About the same<br>3 = Worse off |
| Physical Health status | EuroQual Five Dimensional | Standardised instrument that assesses problems with mobility, self-care, engagement in usual activities, and pain. | 1 = No problems<br>2 = Some Problems/Moderate problems<br>3 = Extreme problems/Unable | 0 = No problems<br>1 = Some/Severe problems           |

|                            |                              |                                                                             |                                                                                                                                                                                                                                                                                                                                      |                                                                                                                                                      |
|----------------------------|------------------------------|-----------------------------------------------------------------------------|--------------------------------------------------------------------------------------------------------------------------------------------------------------------------------------------------------------------------------------------------------------------------------------------------------------------------------------|------------------------------------------------------------------------------------------------------------------------------------------------------|
|                            | Scale (EQ-5D)                |                                                                             |                                                                                                                                                                                                                                                                                                                                      |                                                                                                                                                      |
| Physical health conditions | Psychiatric Morbidity Survey | Have you ever had any of [these health conditions] over the past 12 months? | 1 = Cancer<br>2 = Diabetes<br>3 = Epilepsy/fits<br>4 = Migraine or other frequent headaches<br>5 = Dementia or Alzheimer’s disease<br>6 = Any mental health issue<br>7 = Cataracts / eyesight problems (even if corrected with glasses or contacts)<br>8 = Ear/hearing problems (even if corrected with a hearing aid)<br>9 = Stroke | For each condition:<br><br>0 = condition absent<br>1 = condition present<br><br>For physical and mental health comorbidity:<br><br>0 = No conditions |

|  |  |  |                                                                                                                                                                                                                                                                                                                                                                                        |                                                                                                                                   |
|--|--|--|----------------------------------------------------------------------------------------------------------------------------------------------------------------------------------------------------------------------------------------------------------------------------------------------------------------------------------------------------------------------------------------|-----------------------------------------------------------------------------------------------------------------------------------|
|  |  |  | 10 = Heart attack/angina<br><br>11 = High blood pressure<br><br>12 = Bronchitis/emphysema<br><br>13 = Asthma<br><br>14 = Allergies<br><br>15 = Stomach ulcer or other digestive problems<br><br>16 = Liver problems<br><br>17 = Bowel/colon problems<br><br>18 = Bladder problems/incontinences<br><br>19 = Arthritis<br><br>20 = Bone, back joint or muscle problems<br><br>21 = Gout | 1 = Mental health condition(s) only<br><br>2 = Physical health conditions(s) only<br><br>3 = Physical and mental health condition |
|--|--|--|----------------------------------------------------------------------------------------------------------------------------------------------------------------------------------------------------------------------------------------------------------------------------------------------------------------------------------------------------------------------------------------|-----------------------------------------------------------------------------------------------------------------------------------|

|              |                                 |                                                                                                                      |                                                                                                         |                                                                                                                             |
|--------------|---------------------------------|----------------------------------------------------------------------------------------------------------------------|---------------------------------------------------------------------------------------------------------|-----------------------------------------------------------------------------------------------------------------------------|
|              |                                 |                                                                                                                      | 22 = Skin problems<br><br>95 = Any other condition                                                      |                                                                                                                             |
| Side effects | Health Survey for England (HSE) | Do any of your medications cause side effects or bother you in any way?<br><br>If yes, how much does it bothers you? | 1 = Yes<br><br>2 = No<br><br><br><br>1 = A lot<br><br>2 = Somewhat<br><br>3 = A little<br><br>4 = Never | 0 = No medication<br><br>1 = Never bothers<br><br>2 = Bothers a little<br><br>3 = Bothers somewhat<br><br>4 = Bothers a lot |
| Depression   | Patient Health                  | Assesses how often participants had been bothered by problems such as “Feeling                                       | 1 = Not at all<br><br>2 = Several days                                                                  | N/A                                                                                                                         |

|          |                                                       |                                                                                                                                                                                                              |                                                                                                           |     |
|----------|-------------------------------------------------------|--------------------------------------------------------------------------------------------------------------------------------------------------------------------------------------------------------------|-----------------------------------------------------------------------------------------------------------|-----|
|          | Questionnaire (PHQ-9)                                 | down, depressed, or hopeless” over the past two weeks.                                                                                                                                                       | 3 = More than half the days<br>4 = Nearly every day                                                       |     |
| Anxiety  | Generalised Anxiety Disorder Questionnaire (GAD-7)    | Assesses frequency of events such as “Being so restless that it is hard to sit still” over the past two weeks.                                                                                               | 1 = Not at all<br>2 = Several days<br>3 = More than half the days<br>4 = Nearly every day                 | N/A |
| Paranoia | Five-item Persecution and Deservedness Scale (PaDS-5) | Assesses the extent to which people are suspicious of others’ intentions. Participants rate their level of agreement with statements such as “I’m often suspicious of other people’s intentions towards me.” | 1 = Strongly disagree<br>2 = Disagree<br>3 = Neither agree or disagree<br>4 = Agree<br>5 = Strongly agree | N/A |

|             |                                                        |                                                                                                                                                                                   |                                                                                                |     |
|-------------|--------------------------------------------------------|-----------------------------------------------------------------------------------------------------------------------------------------------------------------------------------|------------------------------------------------------------------------------------------------|-----|
| Wellbeing   | The Warwick-Edinburgh Mental Well-being Scale (WEMWBS) | Abbreviated 7-item scale. Assesses general mood and wellbeing over the previous 2 weeks. Example statements include “I’ve been feeling relaxed” and “I’ve been thinking clearly”. | 1 = None of the time<br>2 = Rarely<br>3 = Some of the time<br>4 = Often<br>5 = All of the time | N/A |
| Self-esteem | Single-item Self-esteem Scale (SISE)                   | Validated scale assessing general levels of self-esteem. Participants rate their level of agreement on a 7-point scale with the statement “I have high self-esteem”.              | 1 = Not very true of me<br>7 = Very true of me                                                 |     |



|                  |                                      |                                                                                                                                                    |                                                                                                           |                                 |
|------------------|--------------------------------------|----------------------------------------------------------------------------------------------------------------------------------------------------|-----------------------------------------------------------------------------------------------------------|---------------------------------|
| Empathy          | Interpersonal Reactivity Index (IRI) | Abbreviated five-item version. Participants rate their level of agreement with statements such as “I am good at predicting how someone will feel”. | 1 = Strongly disagree<br>2 = Disagree<br>3 = Neither agree or disagree<br>4 = Agree<br>5 = Strongly agree |                                 |
| Locus of control | Levenson Locus of Control Scale      | Abbreviated nine-item version. Participants rated their level of agreement with statements such as “My life is determined by my own actions”.      | 1 = Strongly disagree<br>2 = Disagree<br>3 = Neither agree or disagree<br>4 = Agree<br>5 = Strongly agree | N/A                             |
| Hopelessness     | Brief-H-Pos                          | Participants rated their level of agreement with two statements: “The future seems to me to be                                                     | 1 = Strongly disagree<br>2 = Disagree                                                                     | 1 = Strongly agree<br>2 = Agree |

|         |                             |                                                                                                                                                                                                                                                                                                                                         |                                                                                                           |                                                                        |
|---------|-----------------------------|-----------------------------------------------------------------------------------------------------------------------------------------------------------------------------------------------------------------------------------------------------------------------------------------------------------------------------------------|-----------------------------------------------------------------------------------------------------------|------------------------------------------------------------------------|
|         |                             | hopeful and I believe that things are changing for the better” and “I feel that it is possible to reach the goals I would like to strive for”                                                                                                                                                                                           | 3 = Neither agree or disagree<br>4 = Agree<br>5 = Strongly agree                                          | 3 = Neither agree or disagree<br>4 = Disagree<br>5 = Strongly disagree |
| Alcohol | Merseyside Lifestyle Survey | Participants indicated if they ever drank alcohol and if so how many of the following drinks they had consumed over the past seven days: pints of beer (low, normal and strong), pints of cider, bottles of alcopops, glasses of spirits, glasses of wine (small and large), glasses of fortified wine. These numbers were converted to | 1 = none, moderate (<14 units/week),<br>2 = heavy (14-28 units/week),<br>3 = very heavy (>28 units/week). | N/A                                                                    |

|                |                             |                                                                                                                                                                                     |                                                                                                                                      |              |
|----------------|-----------------------------|-------------------------------------------------------------------------------------------------------------------------------------------------------------------------------------|--------------------------------------------------------------------------------------------------------------------------------------|--------------|
|                |                             | alcoholic units and then people were categorized into four levels of alcohol consumption based on the recommended usage of less than 14 units per week (Department of Health, 2016) |                                                                                                                                      |              |
| Smoking status | Merseyside Lifestyle Survey | N/A                                                                                                                                                                                 | 1 = Never smoked<br>2 = Past occasional smoker<br>3 = Past daily smoker<br>4 = Current occasional smoker<br>5 = Current daily smoker | N/A          |
| Social capital | Community Life Survey       | Assesses the extent to which participants agree they receive                                                                                                                        | 1 = Definitely agree                                                                                                                 | 0 = Disagree |

|                         |                       |                                                                                                                                                                                             |                                                                                                                |                                                          |
|-------------------------|-----------------------|---------------------------------------------------------------------------------------------------------------------------------------------------------------------------------------------|----------------------------------------------------------------------------------------------------------------|----------------------------------------------------------|
|                         |                       | <i>practical support</i> (“If I needed help, there are people who would be there for me”) and <i>social contact</i> (“If I wanted company or to socialise, there are people I can call on”) | 2 = Tend to agree<br>3 = Tend to disagree<br>4 = Definitely disagree<br>5 = Don’t know                         | 1 = Agree                                                |
| Neighbourhood belonging | Community Life Survey | Participants were asked “how strongly you feel you belong to your immediate neighbourhood”.                                                                                                 | 1 = Very strongly<br>2 = Fairly strongly<br>3 = Not very strongly<br>4 = Not at all strongly<br>5 = Don’t know | 0 = Not very/at all strongly<br>1 = Fairly/very strongly |

Supplementary File Table 2. *Descriptive statistics for all variables. Discrepancies between total values and crosstabulated values due to non-response on the suicidal ideation variable*

|                                              | <i>N (%)</i> | <i>M (SD)</i> | <i>N(%)<br/>No suicidal<br/>ideation</i> | <i>N(%)<br/>Suicidal<br/>ideation</i> |
|----------------------------------------------|--------------|---------------|------------------------------------------|---------------------------------------|
| <b>Suicidal ideation in previous 2 weeks</b> |              |               |                                          |                                       |
| Suicidal ideation                            | 454 (10.6)   | -             | -                                        | -                                     |
| No suicidal ideation                         | 3833 (89.4)  | -             | -                                        | -                                     |
| <b>Mental health symptoms</b>                |              |               |                                          |                                       |
| Depression (PHQ-9)                           | -            | 4.65(5.77)    | -                                        | -                                     |
| Anxiety (GAD-7)                              | -            | 9.00 (4.33)   | -                                        | -                                     |
| Paranoia (PaDS-5)                            | -            | 9.68 (4.38)   | -                                        | -                                     |
| <b>Age</b>                                   |              |               |                                          |                                       |
| 18-24 years                                  | 421 (9.8)    | -             | 368(87.6)                                | 52 (12.4)                             |
| 25-44 years                                  | 1438 (33.3)  | -             | 1247 (87.3)                              | 181 (12.7)                            |
| 45-64 years                                  | 1329 (30.8)  | -             | 1162 (87.9)                              | 160 (12.1)                            |
| 65+ years                                    | 1129 (26.2)  | -             | 1055 (94.6)                              | 60 (5.4)                              |
| <b>Gender</b>                                |              |               |                                          |                                       |
| Female                                       | 2465 (57.1)  | -             | 2205 (90.2)                              | 249 (9.8)                             |
| Male                                         | 1854 (42.9)  | -             | 1628 (88.4)                              | 214 (11.6)                            |
| <b>Ethnicity</b>                             |              |               |                                          |                                       |
| Black and Minority Ethnic                    | 455 (10.6)   | -             | 414 (91.6)                               | 38 (8.4)                              |
| White                                        | 3855 (89.4)  | -             | 3411 (89.2)                              | 415 (10.9)                            |
| <b>Sexuality</b>                             |              |               |                                          |                                       |
| LGBTQ                                        | 65 (1.5)     | -             | 50 (76.9)                                | 15 (23.08)                            |

|                                                       |             |           |             |            |
|-------------------------------------------------------|-------------|-----------|-------------|------------|
| Not LGBTQ                                             | 4246 (98.5) | -         | 3775 (89.6) | 439 (10.4) |
| <b>Relationship status</b>                            |             |           |             |            |
| Not married/civil partnership                         | 2559 (49.4) | -         | 2209 (87.0) | 330 (13.0) |
| Married/civil partnership                             | 1747 (40.6) | -         | 1613 (92.9) | 123 (7.1)  |
| <b>Education</b>                                      |             |           |             |            |
| No qualifications                                     | 1718 (39.9) | -         | 1498 (88.0) | 205 (12.0) |
| Professional/vocational certificate                   | 1931 (44.8) | -         | 1727 (90.0) | 192 (10.0) |
| Degree or higher                                      | 659 (15.3)  | -         | 599 (91.3)  | 57 (8.7)   |
| <b>Employment status</b>                              |             |           |             |            |
| Employed                                              | 1745 (40.4) | -         | 1608 (92.5) | 130 (7.5)  |
| Not employed                                          | 2570 (59.6) | -         | 2233 (87.3) | 323 (12.7) |
| <b>Housing quality (0-1 scale)</b>                    |             |           |             |            |
|                                                       | -           | .32 (.47) | -           | -          |
| <b>Financial position compared with 12 months ago</b> |             |           |             |            |
| Worse                                                 | 679 (15.7)  | -         | 549 (81.7)  | 123 (18.3) |
| Same                                                  | 3090 (72.2) | -         | 2781 (90.6) | 289 (9.4)  |
| Better                                                | 510 (11.8)  | -         | 471 (92.7)  | 37 (7.3)   |
| <b>Caring responsibilities</b>                        |             |           |             |            |
| None                                                  | 3716 (86.0) | -         | 3298 (89.5) | 389 (10.5) |
| 1-19 hours/week                                       | 275 (6.4)   | -         | 250 (91.6)  | 23 (8.4)   |
| 20-49 hours/week                                      | 100 (2.3)   | -         | 86 (86.0)   | 14 (14.0)  |
| 50+ hours/week                                        | 228 (5.3)   | -         | 199 (87.7)  | 28 (12.3)  |
| <b>Health problems (EQ-5D; 0 – 1 scale)</b>           |             |           |             |            |

|                  |   |           |   |   |
|------------------|---|-----------|---|---|
| Mobility         | - | .24 (.43) | - | - |
| Self-care        | - | .10 (.29) | - | - |
| Usual activities | - | .22 (.42) | - | - |
| Pain             | - | .36 (.48) | - | - |

**Health conditions**

|                           |            |   |            |            |
|---------------------------|------------|---|------------|------------|
| Cancer                    | 120 (2.8)  | - | 99 (83.4)  | 20 (16.8)  |
| Diabetes                  | 341 (7.9)  | - | 299 (87.7) | 42 (12.3)  |
| Epilepsy                  | 80 (1.9)   | - | 52 (65.8)  | 27 (34.2)  |
| Migraine                  | 348 (8.1)  | - | 270 (78.5) | 74 (21.5)  |
| Dementia                  | 21 (0.5)   | - | 17 (81.0)  | 4 (19.0)   |
| Eye                       | 418 (9.7)  | - | 351 (85.2) | 61 (14.8)  |
| Ear                       | 247 (5.7)  | - | 206 (85.1) | 36 (14.9)  |
| Stroke                    | 97 (2.3)   | - | 76 (78.4)  | 21 (21.6)  |
| Heart                     | 280 (6.5)  | - | 240 (87.0) | 36 (13.0)  |
| Blood pressure            | 711 (16.5) | - | 618 (88.0) | 84 (12.0)  |
| Bronchitis/Emphysema      | 113 (2.6)  | - | 91 (81.3)  | 21 (18.7)  |
| Asthma                    | 418 (9.7)  | - | 356 (85.2) | 62 (14.8)  |
| Allergies                 | 185 (4.3)  | - | 158 (86.3) | 25 (13.7)  |
| Stomach/digestive         | 224 (5.2)  | - | 185 (83.0) | 38 (17.0)  |
| Liver                     | 73 (1.7)   | - | 50 (70.4)  | 21 (29.6)  |
| Bowel/colon               | 173 (4.0)  | - | 133 (77.8) | 38 (22.2)  |
| Bladder                   | 136 (3.2)  | - | 108 (80.0) | 27 (20.0)  |
| Arthritis                 | 728 (16.9) | - | 634 (88.1) | 86 (11.9)  |
| Bone, back, joint, muscle | 778 (18.0) | - | 667 (86.4) | 105 (13.6) |
| Gout                      | 51 (1.2)   | - | 47 (92.2)  | 4 (7.8)    |
| Skin                      | 243 (5.6)  | - | 211 (87.6) | 30 (12.4)  |
| Other                     | 267 (6.2)  | - | 235 (88.0) | 32 (12.0)  |

**Side effects**

|                                     |             |             |             |            |
|-------------------------------------|-------------|-------------|-------------|------------|
| No medication                       | 2015 (46.8) | -           | 1842 (92.0) | 160 (8.0)  |
| Never bothers                       | 1945 (45.2) | -           | 1732 (89.7) | 198 (10.3) |
| Bothers a little                    | 79 (1.8)    | -           | 62 (78.5)   | 17 (21.5)  |
| Bothers somewhat                    | 145 (3.4)   | -           | 106 (74.1)  | 37 (25.9)  |
| Bothers a lot                       | 125 (2.9)   | -           | 85 (69.1)   | 38 (30.9)  |
| <b>Alcohol consumption</b>          |             |             |             |            |
| Never (0 units/week)                | 1894 (44.0) | -           | 1674 (89.2) | 202 (10.8) |
| Moderate (1-14 units/week)          | 1973 (45.8) | -           | 1761 (89.7) | 202 (10.3) |
| High (14-28 units/week)             | 290 (6.7)   | -           | 260 (90.0)  | 29 (10.0)  |
| Very high (>28 units/week)          | 151 (3.5)   | -           | 130 (87.3)  | 19 (12.7)  |
| <b>Smoking status</b>               |             |             |             |            |
| Never                               | 2107 (48.8) | -           | 1951 (93.3) | 141 (6.7)  |
| Past occasional smoking             | 286 (6.6)   | -           | 257 (89.9)  | 29 (10.1)  |
| Past daily smoking                  | 671 (15.5)  | -           | 605 (90.8)  | 61 (9.2)   |
| Current occasional smoking          | 122 (2.8)   | -           | 97 (79.5)   | 25 (20.5)  |
| Current daily smoking               | 1118 (25.9) | -           | 910 (82.2)  | 197 (17.8) |
| <b>Psychological factors</b>        |             |             |             |            |
| Empathy                             | -           | 3.35 (.88)  | -           | -          |
| Self-esteem                         | -           | 4.54 (1.73) | -           | -          |
| Hopelessness                        | -           | 2.48 (.97)  | -           | -          |
| Locus of control (power)            | -           | 2.83 (.88)  | -           | -          |
| Locus of control (chance)           | -           | 2.76 (.74)  | -           | -          |
| Locus of control (internal)         | -           | 3.65 (.69)  | -           | -          |
| <b>Social capital and belonging</b> |             |             |             |            |
| Practical support                   | 4084 (94.8) | -           | 3657 (90.2) | 397 (9.8)  |
| People to socialise with            | 4064 (94.4) | -           | 3642 (90.2) | 395 (9.8)  |



|                         |             |   |             |            |
|-------------------------|-------------|---|-------------|------------|
| Neighbourhood belonging | 3518 (82.1) | - | 3176 (90.8) | 322 (9.21) |
|-------------------------|-------------|---|-------------|------------|

Supplementary File Table 3. *Logistic regression predicting suicidal ideation excluding (Model 1) and including (Model 2) mental health variables.*

|                                                  | <i>Model 1</i>                                  |               | <i>Model 2</i>                                  |               |
|--------------------------------------------------|-------------------------------------------------|---------------|-------------------------------------------------|---------------|
| <i>Predictors</i>                                | <i>Adjusted Odds Ratio of suicidal ideation</i> | <i>95% CI</i> | <i>Adjusted Odds Ratio of suicidal ideation</i> | <i>95% CI</i> |
|                                                  |                                                 |               |                                                 |               |
| <b><i>Mental health</i></b>                      |                                                 |               |                                                 |               |
| <i>Depression</i>                                | -                                               | -             | 7.24***                                         | 5.22, 10.07   |
| <i>Anxiety</i>                                   | -                                               | -             | 1.56**                                          | 1.13, 2.17    |
| <i>Paranoia</i>                                  | -                                               | -             | 1.36*                                           | 1.72          |
| <i>Wellbeing</i>                                 | -                                               | -             | .76                                             | .56, 1.01     |
|                                                  |                                                 |               |                                                 |               |
| <b><i>Demographics</i></b>                       |                                                 |               |                                                 |               |
| <i>Age (65+)</i>                                 |                                                 |               |                                                 |               |
| <i>18-24</i>                                     | 5.50***                                         | 2.74, 11.06   | 0.95                                            | .38, 2.38     |
| <i>25-44</i>                                     | 4.50***                                         | 2.48, 8.15    | 1.62                                            | .84, 3.15     |
| <i>45-64</i>                                     | 2.82***                                         | 1.68, 4.73    | 1.1                                             | .60, 2.02     |
|                                                  |                                                 |               |                                                 |               |
| <i>Female</i>                                    | .88                                             | .67, 1.17     | .81                                             | .57, 1.14     |
|                                                  |                                                 |               |                                                 |               |
| <i>Black &amp; Minority Ethnic (BME)</i>         | 1.88*                                           | 1.01, 3.49    | 1.93*                                           | 1.04, 3.62    |
|                                                  |                                                 |               |                                                 |               |
| <i>LGBTQ</i>                                     | 1.93                                            | .77, 4.83     | 2.73*                                           | 1.00, 7.46    |
|                                                  |                                                 |               |                                                 |               |
| <i>Single/never married or civil partnership</i> | 1.16                                            | .87, 1.56     | 1.07                                            | .74, 1.56     |
|                                                  |                                                 |               |                                                 |               |

|                                                     |         |            |        |             |
|-----------------------------------------------------|---------|------------|--------|-------------|
| <b>Socioeconomic status</b>                         |         |            |        |             |
| <i>Education (No qualifications)</i>                |         |            |        |             |
| <i>Professional, vocational or work Certificate</i> | .97     | .71, 1.34  | .76    | .52, 1.12   |
| <i>Degree or higher</i>                             | 1.06    | .67, 1.67  | .70    | .40, 1.21   |
|                                                     |         |            |        |             |
| <i>Non-employment</i>                               | 1.43*   | 1.00, 2.03 | 1.06   | .68, 1.65   |
|                                                     |         |            |        |             |
| <i>Problems with housing</i>                        | 1.67*** | 1.26, 2.23 | 1.34   | .95, 1.89   |
|                                                     |         |            |        |             |
| <i>Financial position (worse)</i>                   |         |            |        |             |
| <i>Same</i>                                         | 1.68*   | 1.02, 2.76 | 2.29** | 1.24, 4.23  |
| <i>Better</i>                                       | 1.59    | .91, 2.77  | 1.19   | .58, 2.42   |
|                                                     |         |            |        |             |
| <b>Caring responsibilities</b>                      |         |            |        |             |
| <i>None</i>                                         |         |            |        |             |
| <i>1-19 hours/week</i>                              | 0.69    | .38, 1.24  | .64    | .32, 1.30   |
| <i>20-49 hours/week</i>                             | 1.24    | .61, 2.53  | 1.00   | .39, 2.57   |
| <i>50+ hours/week</i>                               | 1.23    | .65, 2.33  | .68    | .31, 1.49   |
|                                                     |         |            |        |             |
| <b>Health problems (EQ-5D)</b>                      |         |            |        |             |
| <i>Pain</i>                                         | 1.62*   | 1.09, 2.40 | 0.98   | .61, 1.56   |
| <i>Self-care</i>                                    | 1.38    | .83, 2.27  | 1.02   | .50, 2.08   |
| <i>Usual activities</i>                             | 1.02    | .64, 1.62  | 0.64   | .35, 1.18   |
| <i>Mobility</i>                                     | 1.00    | .64, 1.55  | 1.12   | .65, 1.93   |
|                                                     |         |            |        |             |
| <b>Health conditions</b>                            |         |            |        |             |
| <i>Cancer</i>                                       | 1.74    | .80, 3.77  | 3.90** | 1.40, 10.84 |
| <i>Diabetes</i>                                     | 1.03    | .58, 1.83  | .86    | .43, 1.75   |
| <i>Epilepsy</i>                                     | 1.73    | .98, 3.06  | 1.65   | .80, 3.39   |

|                                                  |               |                   |             |                  |
|--------------------------------------------------|---------------|-------------------|-------------|------------------|
| <i>Migraine</i>                                  | <i>1.27</i>   | <i>.83, 1.94</i>  | <i>0.73</i> | <i>.39, 1.35</i> |
| <i>Dementia</i>                                  | <i>.71</i>    | <i>.26, 1.98</i>  | <i>0.29</i> | <i>.06, 1.47</i> |
| <i>Eye</i>                                       | <i>.97</i>    | <i>.64, 1.48</i>  | <i>1.23</i> | <i>.74, 2.06</i> |
| <i>Ear</i>                                       | <i>2.02**</i> | <i>1.20, 3.41</i> | <i>1.24</i> | <i>.59, 2.59</i> |
| <i>Stroke</i>                                    | <i>2.01*</i>  | <i>1.06, 3.81</i> | <i>1.63</i> | <i>.57, 4.68</i> |
| <i>Heart</i>                                     | <i>.80</i>    | <i>.47, 1.37</i>  | <i>1.3</i>  | <i>.68, 2.48</i> |
| <i>Blood pressure</i>                            | <i>1.19</i>   | <i>.47, 1.80</i>  | <i>1.3</i>  | <i>.77, 2.18</i> |
| <i>Bronchitis/Emphysema</i>                      | <i>1.28</i>   | <i>.65, 2.51</i>  | <i>2</i>    | <i>.84, 4.80</i> |
| <i>Asthma</i>                                    | <i>1.11</i>   | <i>.69, 1.76</i>  | <i>0.95</i> | <i>.51, 1.77</i> |
| <i>Allergies</i>                                 | <i>1.09</i>   | <i>.56, 2.13</i>  | <i>0.89</i> | <i>.31, 2.53</i> |
| <i>Stomach/digestive</i>                         | <i>1.06</i>   | <i>.63, 1.77</i>  | <i>1.18</i> | <i>.59, 2.37</i> |
| <i>Liver</i>                                     | <i>1.06</i>   | <i>.53, 2.12</i>  | <i>0.68</i> | <i>.29, 1.58</i> |
| <i>Bowel/colon</i>                               | <i>1.54</i>   | <i>.90, 2.62</i>  | <i>1.64</i> | <i>.81, 3.32</i> |
| <i>Bladder</i>                                   | <i>1.35</i>   | <i>.73, 2.51</i>  | <i>0.76</i> | <i>.35, 1.64</i> |
| <i>Arthritis</i>                                 | <i>.59*</i>   | <i>.40, .88</i>   | <i>.54*</i> | <i>.30, .95</i>  |
| <i>Bone, back, joint, muscle</i>                 | <i>.76</i>    | <i>.52, 1.10</i>  | <i>0.89</i> | <i>.53, 1.49</i> |
| <i>Gout</i>                                      | <i>.46</i>    | <i>.12, 1.83</i>  | <i>0.57</i> | <i>.06, 5.40</i> |
| <i>Skin</i>                                      | <i>.62</i>    | <i>.35, 1.09</i>  | <i>0.49</i> | <i>.23, 1.04</i> |
| <i>Other</i>                                     | <i>.93</i>    | <i>.57, 1.51</i>  | <i>1.06</i> | <i>.60, 1.88</i> |
|                                                  |               |                   |             |                  |
| <b><i>Mental health comorbidity</i></b>          |               |                   |             |                  |
| <i>No conditions</i>                             |               |                   |             |                  |
| <i>Mental health condition(s)</i>                | <i>-</i>      | <i>-</i>          | <i>1.46</i> | <i>.67, 3.16</i> |
| <i>Physical health condition(s)</i>              | <i>-</i>      | <i>-</i>          | <i>0.78</i> | <i>.45, 1.36</i> |
| <i>Physical &amp; mental health condition(s)</i> | <i>-</i>      | <i>-</i>          | <i>1.02</i> | <i>.49, 2.10</i> |
|                                                  |               |                   |             |                  |
| <b><i>Side effects</i></b>                       |               |                   |             |                  |
| <i>No medication</i>                             |               |                   |             |                  |
| <i>Never bothers</i>                             | <i>1.47*</i>  | <i>1.02, 2.12</i> | <i>1.25</i> | <i>.77, 2.03</i> |

|                         |        |            |  |      |           |
|-------------------------|--------|------------|--|------|-----------|
| <i>Bothers a little</i> | 2.93** | 1.35, 6.36 |  | 1.72 | .64, 4.67 |
| <i>Bothers somewhat</i> | 2.31** | 1.23, 4.34 |  | 0.83 | .37, 1.86 |
| <i>Bothers a lot</i>    | 2.64** | 1.37, 5.10 |  | 0.72 | .25, 1.93 |
|                         |        |            |  |      |           |

|                                    |         |            |       |           |
|------------------------------------|---------|------------|-------|-----------|
| <b>Alcohol consumption</b>         |         |            |       |           |
| <i>Moderate (&lt;14 units)</i>     |         |            |       |           |
| <i>None (0 units)</i>              | .63**   | .46, .87   | .61*  | .42, .90  |
| <i>Heavy (14-28 units)</i>         | .77     | .45, 1.34  | 0.53  | .23, 1.21 |
| <i>Very heavy (&gt;28 units)</i>   | .51     | .25, 1.02  | 0.66  | .31, 1.39 |
|                                    |         |            |       |           |
| <b>Smoking status</b>              |         |            |       |           |
| <i>Never</i>                       |         |            |       |           |
| <i>Past occasional smoking</i>     | 1.52    | .88, 2.65  | 1.65  | .82, 3.32 |
| <i>Past daily smoking</i>          | 1.24    | .81, 1.90  | 1.05  | .62, 1.77 |
| <i>Current occasional smoking</i>  | 1.99*   | 1.04, 3.81 | 1.78  | .80, 3.96 |
| <i>Current daily smoking</i>       | 1.92*** | 1.35, 2.74 | 1.51  | .98, 2.33 |
|                                    |         |            |       |           |
| <b>Psychological factors</b>       |         |            |       |           |
| <i>Empathy</i>                     | 0.82*   | .70, .96   | .72** | .59, .88  |
| <i>Self-esteem</i>                 | .81***  | .75, .88   | .97   | .87, 1.09 |
| <i>Hopelessness</i>                | 1.20*   | 1.02, 1.41 | .93   | .75, 1.15 |
| <i>Locus of control (power)</i>    | 1.08    | .90, 1.30  | .89   | .71, 1.11 |
| <i>Locus of control (chance)</i>   | 1.35**  | 1.11, 1.64 | 1.23  | .95, 1.60 |
| <i>Locus of control (internal)</i> | .95     | .76, 1.19  | 1.05  | .82, 1.36 |
|                                    |         |            |       |           |
| <b>Social capital</b>              |         |            |       |           |
| <i>Practical support</i>           | .70     | .30, 1.61  | .67   | .26, 1.70 |
| <i>Socialise</i>                   | 1.28    | .63, 2.61  | 1.57  | .63, 3.92 |
| <i>Neighbourhood Belonging</i>     | .69*    | .48, .97   | .90   | .58, 1.38 |

\*  $p < .05$ , \*\*  $p < .01$ , \*\*\*  $p < .001$
